# Supplementary material
Source: Springer Nature journal article supplement (https://www.springermedizin.de/resource/supplementary/12889_2014_6536_MOESM5_ESM.pdf/9498484)

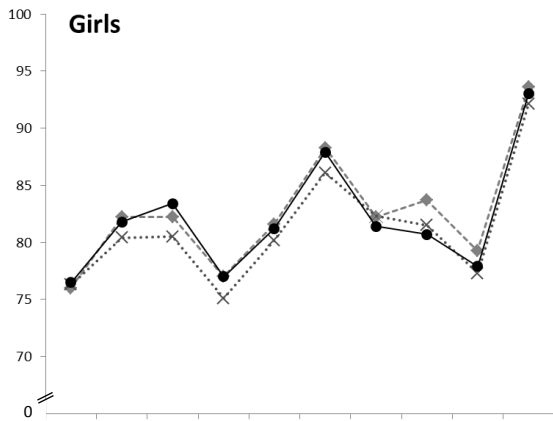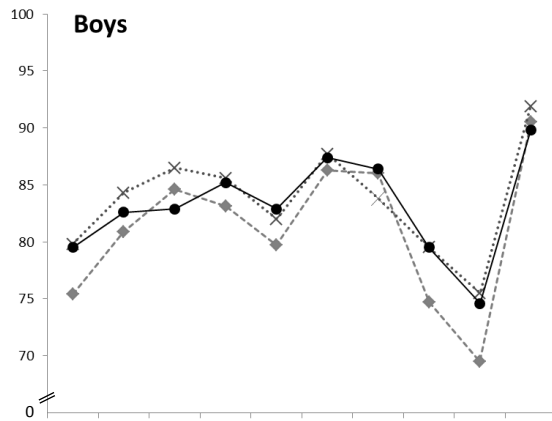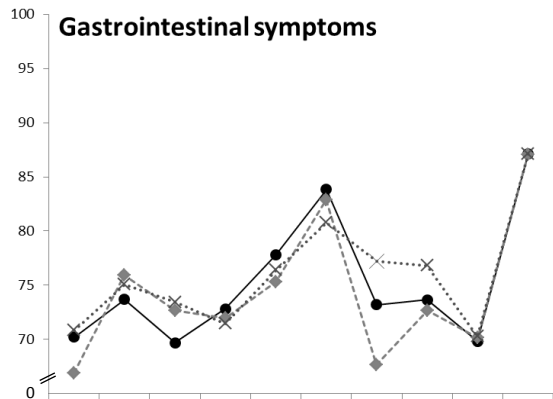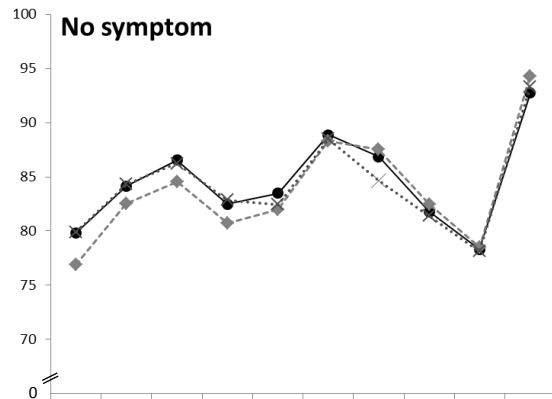

Mean HRQoL subdomain scores

- Undetected CD
- -◆- - Diagnosed CD
- ...×... Without CD

Supplement: MOESM5 [file 9498484]
